# Supplementary material
Source: PubMed Central journal article supplement (PMC5167187)
Supplement: pnas.1611769113.sapp.pdf [file pnas.1611769113.sapp.pdf]

### Supplementary Note 1: Arrhenius model

To assess chronic reliability, we utilized extrapolations based on Arrhenius scaling of time to failure with temperature. By observing the behavior of devices at elevated temperatures, this scaling approach yields estimates for the time of failure at reduced temperatures. This form of accelerated testing utilizes the Arrhenius equation:

$$r = A \exp\left(\frac{-E_a}{kT}\right) \quad (1)$$

where  $r$  = rate of the process,  $A$  = a proportional multiplier,  $E_a$  = the activation energy for the process, and  $k$  = Boltzmann constant.

Rearranging the equation yields a model for the temperature dependence of the failure time,

$$\ln\left(\frac{t_2}{t_1}\right) = \frac{E_a}{k} \left(\frac{1}{T_2} - \frac{1}{T_1}\right) \quad (2)$$

where  $t_1$  = time to failure at  $T_1$  and  $t_2$  = time to failure at  $T_2$ .

For  $T_1 = 90$  °C,  $T_2 = 60$  °C, experiments show that  $t_1 = 6$  days and  $t_2 = 30$  days. From these data, the value of  $E_a$  can be determined to be 60 kJ/(mol.K), similar to values in the literature [1]. This information allows extrapolation to time to failure at 37 °C, which is 180 days (6 months).

### **Supplementary Note 2: Tailored properties in stretchable multi-channel antennas**

Stretchable multi-channel antennas can be designed with a wide range of operating frequencies.

**Supplementary Fig. 5** explains the process of selecting designs that define a desired pair of operational frequency (and, therefore, channel separation). In these examples, the operation frequency at Channel 2 varies from 2.7 to 3.1 GHz with a frequency of 2.3 GHz at Channel 1. The total capacitance required for resonance at the corresponding frequency ranges appears in **Supplementary Fig. 5**. This capacitance provides an estimate of the dimensions of the antenna. Based on the estimates and unit capacitances in **Fig. 4D**, it is possible to determine the number of serpentine pairs needed for resonance at the operation frequency.

### Supplementary Note 3: Calculation of electrostatic potential and capacitance

Assume that the length in the X-direction is much greater than the height in the Y-direction. The boundary function of the serpentine lines can be expressed by,

$$y = h - l \cos(kx) \quad \text{where } k = \frac{2\pi}{p} \quad (3)$$

The electrostatic potential function,  $\Psi(x, y)$ , satisfies the boundary and periodic conditions given by,

$$\Psi(x, y) = \begin{cases} V_0 & \text{if } y = h - l \cos(kx) \\ -V_0 & \text{if } y = -h + l \cos(kx) \end{cases} \quad (4)$$

$$\Psi(x, y) = \Psi(x + p, y) \quad (5)$$

Based on these conditions, one can solve Laplace equation,

$$\frac{\delta^2 \Psi(x, y)}{\delta x^2} + \frac{\delta^2 \Psi(x, y)}{\delta y^2} = 0 \quad (6)$$

beginning with a general solution that exploits separation of variables.

$$\Psi(x, y) = X(x)Y(y) \quad (7)$$

Plugging the (7) into (6) and imposing the conditions in (4) and (5) leads to

$$X_n(x) = a_n \cos(nkx) + b_n \sin(nkx) \quad n = 1, 2, 3, \dots \quad (8)$$

$$Y_n(y) = c_n e^{nky} + d_n e^{-nky} \quad n = 1, 2, 3, \dots \quad (9)$$

$$a \cos(qx) + b \sin(qx) = a \cos(q(x + p)) + b \sin(q(x + p))$$

$$\text{where } q, p = 2\pi n, \quad n = 1, 2, 3, \dots \quad (10)$$

$$\Psi_n(x, y) = (a_n \cos(nkx) + b_n \sin(nkx)) [c_n e^{nky} + d_n e^{-nky}],$$

$$n = 1, 2, 3, \dots \quad (11)$$

$$\Psi(x, y) = \frac{V_0}{h} y + \frac{V_0}{h} \frac{\sinh(ky) \cos(kx)}{\sinh(k(h-l \cos(kx)))} \quad k = \frac{2\pi}{p} \quad (12)$$

The derivative of this expression with respect to y yields the Y components of the electric field,

$$E_Y(x, y) = -\frac{V_0}{h} - \frac{V_0}{h} k \frac{\cosh(ky) \cos(kx)}{\sinh(k(h-l \cos(kx)))} \quad k = \frac{2\pi}{p} \quad (13)$$

Next, we calculate the capacitance between two serpentine lines. This serpentine shaped- capacitor consists of infinite capacitors where capacitance is determined by (**Fig. 4B**),

$$dC = \varepsilon \frac{dx}{y} \quad \text{where } y = 2h + 2l \sin x \quad (14)$$

Integrating this expression along the length of the serpentine lines yields the capacitance.

$$C = \int dC = \int \frac{dx}{y} = \int \frac{dx}{2h+2l \sin x} \quad (15)$$

#### Supplementary Note 4: MATLAB code for motion tracking algorithm

```
vidDevice = imaq.VideoDevice('winvideo', 1, 'YUY2_320x240', ...
'ROI', [1 1 320 240], ...
'ReturnedColorSpace', 'rgb');
optical = vision.OpticalFlow('OutputValue', 'Horizontal and vertical components in complex form');
maxWidth = imaqhwinfo(vidDevice, 'MaxWidth');
maxHeight = imaqhwinfo(vidDevice, 'MaxHeight');
shapes = vision.ShapeInserter;
shapes.Shape = 'Lines';
shapes.BorderColor = 'Custom';
shapes.CustomBorderColor = [255 0 0];
r = 1:20:maxHeight;
c = 1:20:maxWidth;
[Y, X] = meshgrid(c,r);
hVideoIn = vision.VideoPlayer;
hVideoIn.Name = 'Original Video';
hVideoIn.Position = [30 100 320 240];
hVideoOut = vision.VideoPlayer;
hVideoOut.Name = 'Motion Detected Video';
hVideoOut.Position = [400 100 320 240];
nFrames = 0;
```

```

devices = daq.getDevices;
devices(1);
s = daq.createSession('ni');
addDigitalChannel(s,'Dev1','port0/line0:3','OutputOnly');
outputSingleScan(s,[ 1 1 1 1]);
sum=0;
while (nFrames < 2000)
rgbData = step(vidDevice);
optFlow = step(optical,rgb2gray(rgbData));
optFlow_DS = optFlow(r, c);
H = imag(optFlow_DS)*50;
V = real(optFlow_DS)*50;
lines = [Y(:)'; X(:)'; Y(:)'+V(:)'; X(:)'+H(:)'];
rgb_Out = step(shapes, rgbData, lines');
%%rgb_Out = step(shapes, rgb_Out, lines');
%%step(hVideoIn, rgbData);
step(hVideoOut, rgb_Out);
x=rgbData-rgb_Out;
for i=1:1:240
    for j=1:1:320
        if (x(i,j,3) > 0)
            if (j >160)
                outputSingleScan(s,[ 0 0 0 0]);
                i=240;
                j=320;
            else
                outputSingleScan(s,[ 1 1 1 1]);
                i=240;
                j=320;
            end
        end
    end
end
end

nFrames = nFrames + 1;
end
release(hVideoOut);
release(hVideoIn);
release(vidDevice);

```

## Reference

1. Thomas, T. H. & Kendrick, T.C. Thermal Analysis of Polydimethylsiloxanes. I. Thermal Degradation in Controlled Atmospheres. *J.Polym. Sci.* 7, 537-549 (1969).

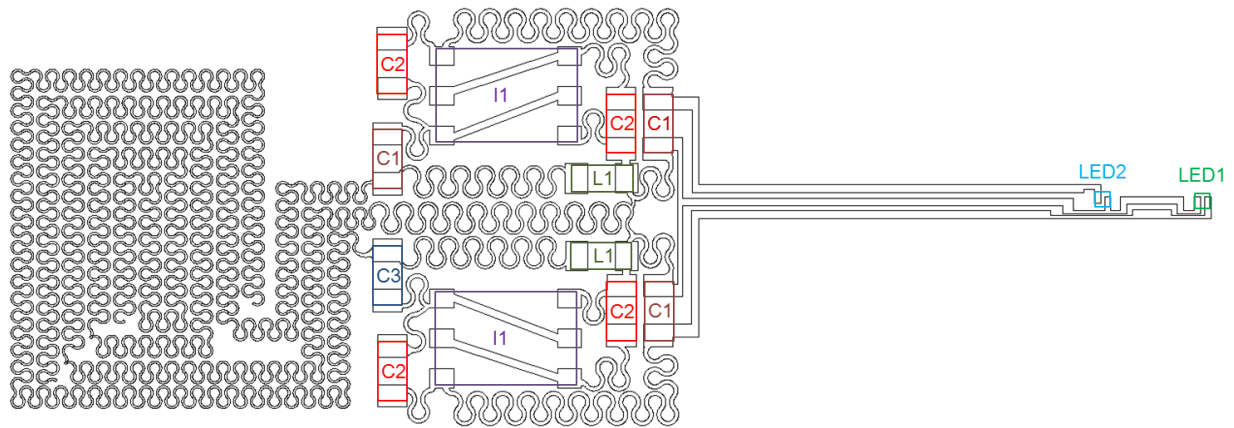

|             | Components                                  | Product number  | Vendor information  |
|-------------|---------------------------------------------|-----------------|---------------------|
| <b>LED1</b> | 540 nm, 0.22 mm x 0.27 mm x 0.05 mm         | C527TR2227-0215 | Cree Inc.           |
| <b>LED2</b> | 465 nm, 0.22 mm x 0.27 mm x 0.05 mm         | C460TR2227-0216 | Cree Inc.           |
| <b>C1</b>   | Capacitor, 1 pF, 0.2 mm x 0.4 mm x 0.22 mm  | 250R05L1R0BV4T  | Johanson Technology |
| <b>C2</b>   | Capacitor, 5 pF, 0.6 mm x 0.3 mm x 0.33 mm  | 250R05L5R1CV4T  | Johanson Technology |
| <b>C3</b>   | Capacitor, 3 pF, 0.6 mm x 0.3 mm x 0.33 mm  | 250R05L3R1CV4T  | Johanson Technology |
| <b>I1</b>   | Schottky diode, 1.7 mm x 1.5 mm x 0.5 mm    | 1PS66SB82,115   | NXP Semiconductor   |
| <b>L1</b>   | Inductor, 2.7 nH, 0.2 mm x 0.4 mm x 0.22 mm | L-05B2N7SV6T    | Johanson Technology |

Supplementary Fig. 1. Layout and component information for the multi-channel devices.

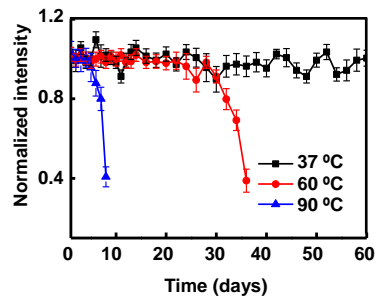

Supplementary Fig. 2. Assessment of variations in normalized light intensity produced by the multi-channel system as a function of time of immersion in physiological PBS (7.4 pH) solution at three different temperatures.

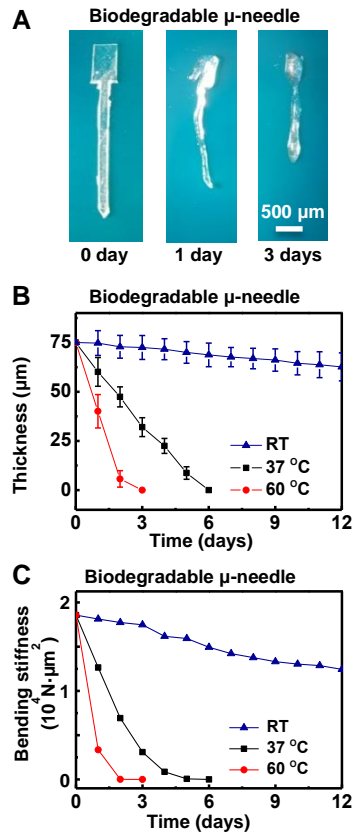

Supplementary Fig. 3. (A) Images of a biodegradable, injectable  $\mu$ -needle in physiological PBS solution after 0 day (left), 1 day (middle), and 3 days (right) respectively. Results of measurements of the  $\mu$ -needle thickness (B) and bending stiffness (C) as a function of time of immersion in PBS at a variety of temperatures.



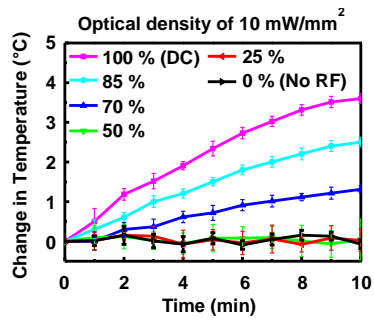

Supplementary Fig. 4. In vivo monitoring of temperature of a mouse during device operation, for various duty cycles (DC).

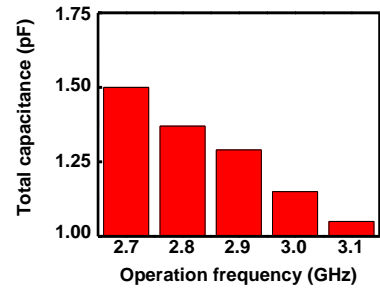

Supplementary Fig. 5. Total capacitance values for stretchable antennas with resonance frequencies between 2.7 to 3.1 GHz .

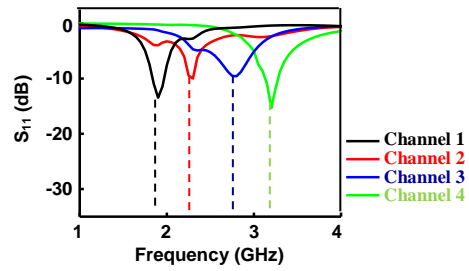

Supplementary Fig. 6. Scattering coefficients,  $S_{11}$ , of a 4-channel stretchable antenna. The antenna has 4 operation channels at a frequency of 1.9 (black), 2.2 (red), 2.8 (blue), and 3.2 (green) GHz, respectively.

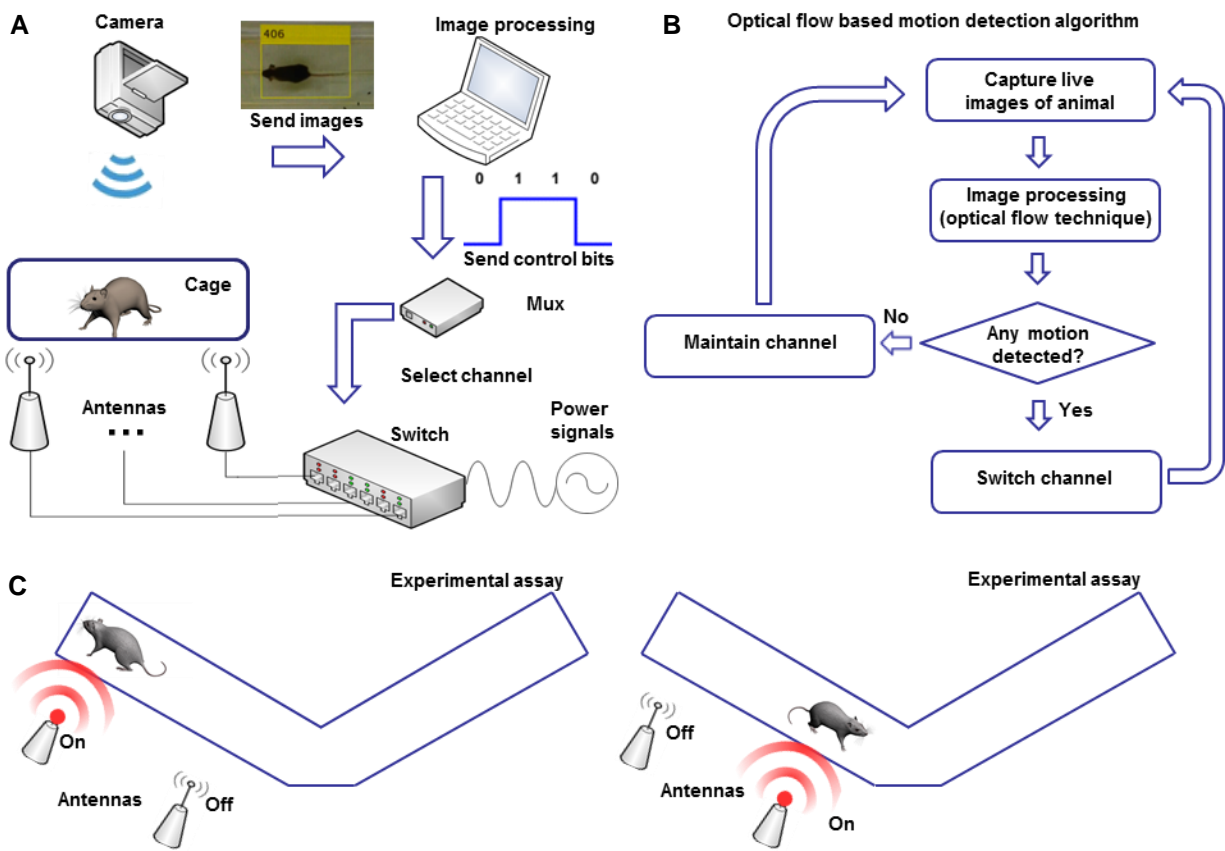

Supplementary Fig. 7. (A) Illustration of motion tracking power transmission systems. A camera monitors the location of a mouse and sends images to the base station, which processes the images and sends control signals to the multiplexer (Mux). Output signals from Mux manipulate a switch that activates the appropriate circuit to transmit power with the appropriate antenna. These processes occur within 1 ms which is fast enough to respond to the motions of a mouse instantaneously. (B) Flowchart of the motion detection algorithm. (C) Illustration of smart power transmission. The antenna that is closest to the mouse is enabled and transmits power.

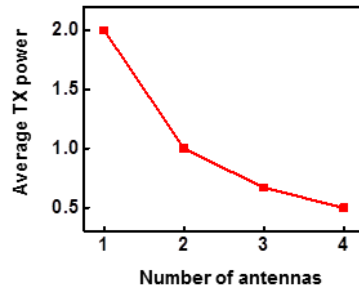

Supplementary Fig. 8. Plot of average TX power as a function of number of antennas. The smart power system distributes a given TX power of 2 W across the antennas.

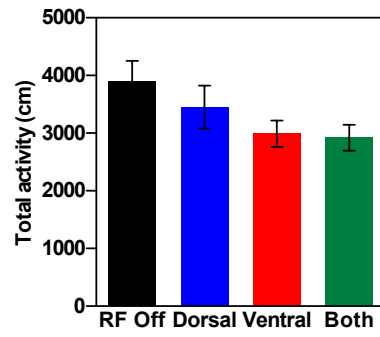

Supplementary Fig. 9. Analysis of the total distance traveled, as an assessment of activity level, during a 20 min experiment.

| Process                             | Purpose                             | Required time<br>for 5 devices | Equipment                   | Progress<br>level (%) |
|-------------------------------------|-------------------------------------|--------------------------------|-----------------------------|-----------------------|
| 1. Preparation of PMMA coated glass | Sampling for transfer               | 0.5 hour                       | Cleanroom<br>Spin-coater    | 5                     |
| 2. PI film fabrication              | Bottom encapsulating layer          | 1.5 hours                      | Cleanroom,<br>Vacuum oven   | 15                    |
| 3. Metal (Ti/Au) deposition         | Interconnection                     | 1.5 hours                      | E-beam<br>deposition        | 25                    |
| 4. Metal patterning                 |                                     | 1 hours                        | Cleanroom,<br>Mask aligner  | 30                    |
| 5. PI encapsulation                 | Top encapsulating layer             | 1.5 hours                      | Cleanroom,<br>Vacuum oven   | 40                    |
| 6. PI/Metal/PI patterning           | Patterning for stretchable circuits | 1 hours                        | Cleanroom,<br>mask aligner, | 50                    |
| 7. PI etching                       |                                     | 1.5 hours                      | RIE                         | 60                    |
| 6. Components transfer              | Active components integration       | 2.5 hours                      | Solder,<br>Microscope       | 80                    |
| 7. PDMS encapsulation               | System packaging                    | 0.5 hour                       | Oven                        | 100                   |

**Supplementary Table 1: Fabrication process details**

**Supplementary Movie 1.** Video of an operating device. This demonstrates that the frequency of the incident RF radiation can be adjusted to activate the channels independently.

**Supplementary Movie 2.** Video of a freely behaving animal with the device implanted in a cage. This demonstrates that wireless power transmission systems can enable continuous operation throughout a location of interest.
